# Supplementary material for: Chitooligosaccharides Derivatives Protect ARPE-19 Cells against Acrolein-Induced Oxidative Injury
Source: MDPI journal article supplement (doi:10.3390/md21030137), 2023-02-22
Supplement: s1 [file s1]

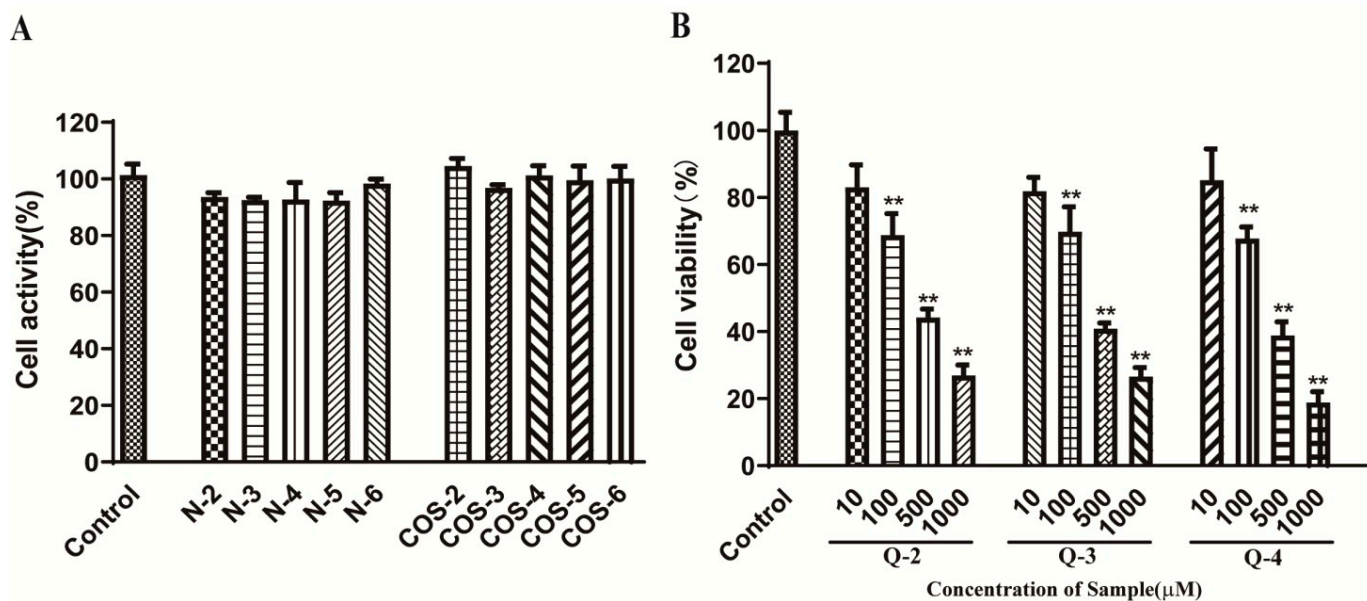

**Figure S1.** The cytotoxicity of COSs, NACOs and PACOs in ARPE-19 cell. The cells were treated with 1 mM COSs or NACOs (A) or 10, 100, 500, 1000 μM PACOs (B) for 24 h. Cell viability was analyzed using the MTT method. Values are mean ± SD of five separate experiments. \*\* $p < 0.01$  vs. control.

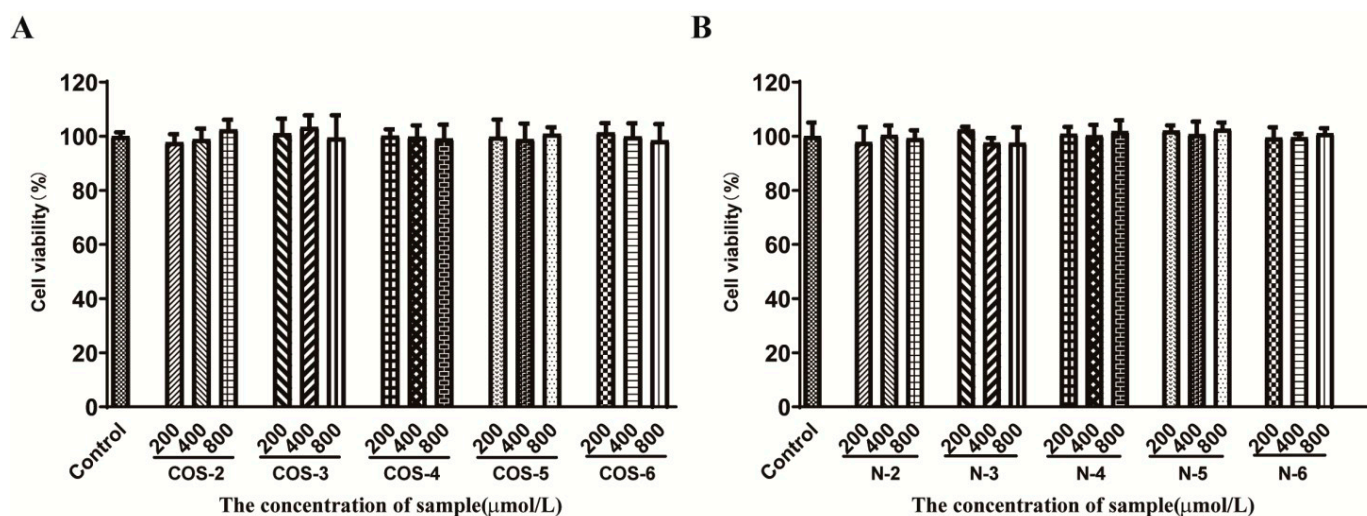

**Figure S2.** Effects of COSs and NACOs on the proliferation of ARPE-19 cells. The cells were treated with 200, 400, 800 μM COSs (A) or NACOs (B) for 48 h. Cell viability was analyzed using the MTT method. Values are mean ± SD of five separate experiments.

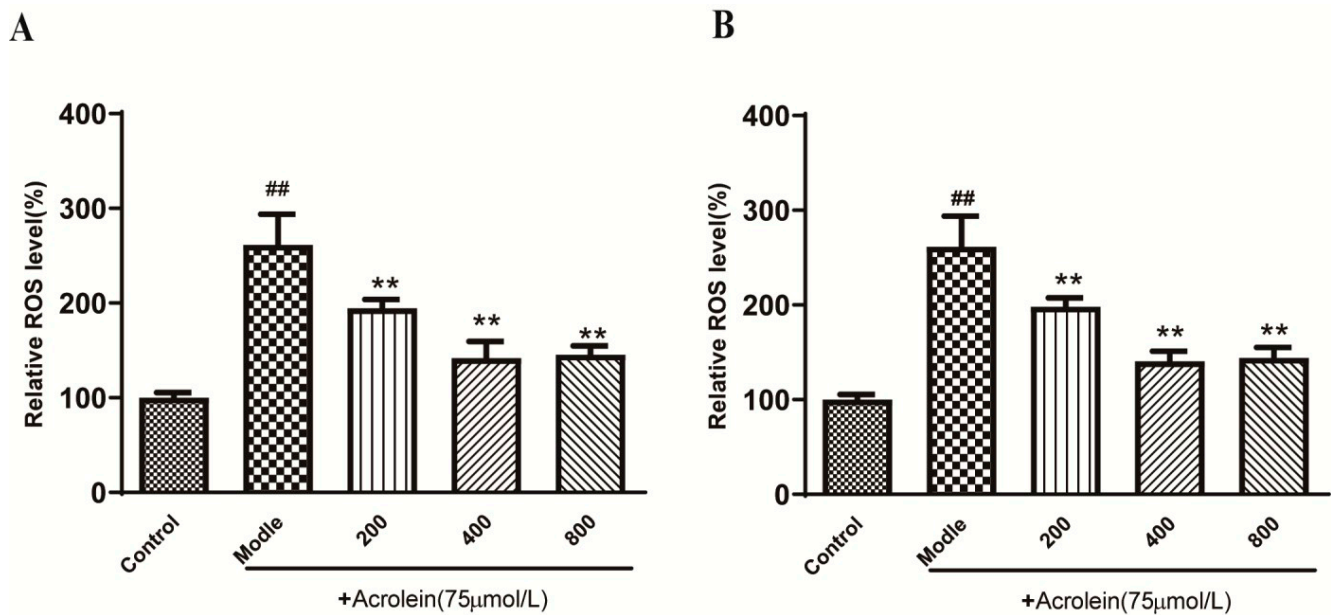

**Figure S3.** COS-5 and N-5 against acrolein-induced oxidative stress. ARPE-19 cells were treated with 200, 400, 800  $\mu$ M COS-5 (A) or N-5 (B) for 48 h and then treated with acrolein for additional 24 h. Cellular ROS generation in PRE cells was determined by the 2', 7'-dichlorofluorescein diacetate (DCFH-DA) method. The data expressed as ratio relative to controls. Values are mean  $\pm$  SD of three separate experiments. ## $p$  < 0.01 vs. control (no acrolein, no COS-5 and N-5); \* $p$  < 0.05, \*\* $p$  < 0.01 vs. acrolein.

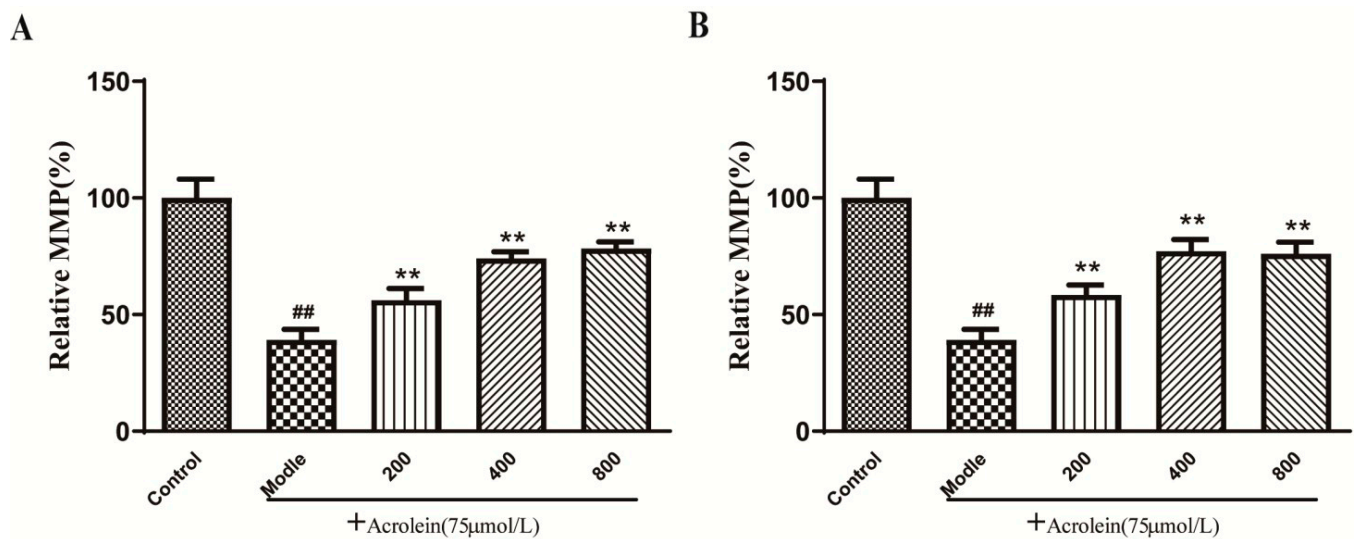

**Figure S4.** Protective effect of COS-5 and N-5 against acrolein-induced ARPE-19 mitochondrial dysfunction. The cells were pre-treated with 200, 400, 800  $\mu$ M COS-5 (A) or N-5 (B) for 48 h and then treated with 75  $\mu$ M acrolein for additional 24 h. The effects of COS-5 or N-5 on mitochondrial membrane potential were tested using the JC-1 method. Data are red/green (590/530 nm) fluorescence ratios. The data expressed as ratio relative to controls. Values are mean  $\pm$  SD of three separate experiments. ## $p$  < 0.01 vs. control (no acrolein, no COS-5 and N-5); \* $p$  < 0.05, \*\* $p$  < 0.01 vs. acrolein.
